# Supplementary material for: ERBB2 mutations associated with solid variant of high-grade invasive lobular breast carcinomas
Source: PubMed Central journal article supplement (PMC5341983; doi:10.18632/oncotarget.11819), 2016-09-02
Supplement: oncotarget-07-73337-s001.pdf [file oncotarget-07-73337-s001.pdf]

## **ERBB2 mutations associated with solid variant of high-grade invasive lobular breast carcinomas**

### **SUPPLEMENTARY TABLES**

**Supplementary Table S1: We analysed the 9 cases with ERBB2 mutation from the TCGA 2015 study using the Cancer Digital Slide archive (cancer.digitalslidearchive.net/) recovered from the cBioportal (<http://www.cbioportal.org/>). Grade and morphologic subtype were done and it is summarized in the following table:**

| <b>Case ID</b>  | <b>ERBB2 mutation</b> | <b>Grade</b>                                                | <b>Differentiation</b> | <b>Nucleus</b> | <b>Mitosis</b> | <b>Subtype</b>           |
|-----------------|-----------------------|-------------------------------------------------------------|------------------------|----------------|----------------|--------------------------|
| TCGA-OK-A5Q2-01 | L755S                 | G2                                                          | 3                      | 2              | 1              | Mixed classic alveolar   |
| TCGA-JL-A3YW-01 | Q548R                 | G2                                                          | 3                      | 3              | 1              | Solid                    |
| TCGA-D8-A27G-01 | I767M                 | G2                                                          | 3                      | 3              | 1              | Classic apocrine         |
| TCGA-C8-A3M7-01 | S305C                 | G2                                                          | 3                      | 2              | 1              | Classic                  |
| TCGA-BH-A0C1-01 | V777L                 | G2                                                          | 3                      | 3              | 1              | Classic                  |
| TCGA-AC-A3YI-01 | L755S                 | G2                                                          | 3                      | 2              | 1              | Classic                  |
| TCGA-A8-A0AB-01 | L755S                 | G3                                                          | 3                      | 3              | 3              | Mixed classic trabecular |
| TCGA-A8-A0A6-01 | L755S                 | Frozen section of too poor quality to be correctly analyzed |                        |                |                |                          |
| TCGA-A2-A0T6-01 | R678Q, L755R          | G2                                                          | 3                      | 2              | 1              | Mixed classic solid      |

Few preliminary remarks can be done:

- ⇒ The 9 *ERBB2* mutated cases are split as follows: 7 were of grade 2, 1 of grade 3 and 1 was not analyzed.
- ⇒ In addition, out of these 9 *ERBB2* mutated cases, 4 were of classical subtype, 3 were of mixed subtype, 1 was of solid subtype and 1 was not analyzed.

The population is too small to draw any meaningful conclusion at this stage. However, it reinforces the idea that we should analyze the whole cohort including grade 1 and 2 ILC in a later study.

Supplementary Table S2: Primer sequences

| Gene            | Detectable mutations                                                                         | Primer sequences U(5'-3') and L(5'-3')                         | Amplicon size (nt) |
|-----------------|----------------------------------------------------------------------------------------------|----------------------------------------------------------------|--------------------|
| D-ERBB2 Exon 8  | p.S310F c.929 C>T; p.S310Y c.929 C>A                                                         | U : GGGCACGGTAATGCTGCTCA<br>L : CAGGGCTTGCTGCACTTCTCA          | 185                |
| D-ERBB2 Exon 17 | p.R678Q c.2033G>A                                                                            | U : GCATTCTGCTGGTCGTGGTCTT<br>L : GACTTCACCCCGCCTCACCT         | 125                |
| D-ERBB2 Exon 19 | p.L755M c.2263 T>A; p.L755P c.2263_2264 TT>CC; p.L755S c.2264 T>C; p.L755W c.2264 T>G        | U : TTCTCACTCATATCCTCCTCTTTCTG<br>L : GGGGTCCTTCCTGTCTCCT      | 175                |
| D-ERBB2 Exon 20 | p.V777A c.2330 T>C; p.V777L c.2329 G>T; p.V777M c.2329 G>A                                   | U : TGTGGTCTCCCATACCTCTCAG<br>L : TGTCAGGCAGATGCCAGAAG         | 106                |
| D-ERBB2 Exon 21 | p.V842I c.2524 G>A                                                                           | U : CAGGCCCTCCAGAAAGGTCTA<br>L : AGCCCGAAGTCTGTAATTTTGACAT     | 146                |
| D-ERBB3 Exon 3  | p.M91I c.273 G>A; p.V104M c.310 G>A; p.V104L c.310 G>T; p.N126I c.377 A>T; p.N126K c.378 C>T | U : TCACAGTGGATTCGAGAAGTGACA<br>L : ACTGACCGGTGAGCTGAGTCAA     | 197                |
| D-ERBB3 Exon 6  | p.H228Q c.684 T>A; p.H228R; p.A232V c.695 C>T; p.A232T c694G>A                               | U : CTGTGCTCCTCAGTGTAAATGGTCA<br>L : CAATGGAAAGGGTACATACAAAGCA | 125                |
| D-ERBB3 Exon 7  | p.G284R c.850 G>A; p.G284G c.852 A>G                                                         | U : GAACCCAATCCCCACACCAAGT<br>L : TGATCATTGTTCTTCCCCTCAGA      | 89                 |
| D-ERBB3 Exon 8  | p.D297N c.889 G>A; p.D297Y c.889 G>T; p.D297V c.890 A>T                                      | U : CATTGGTAGCTGGTGATGTTTCT<br>L : TCCCCACAAGGCTCACACAT        | 161                |
